# Supplementary material
Source: publisher figshare collection journal article supplement (https://sage.figshare.com/ndownloader/files/14569538)
Supplement: Supplementary file 1 [file 14569538]

**Supplement 1.** Implementation timeline of vancomycin 24-hour area under the curve dosing and monitoring.

| 2/10/17: ACPE-approved presentation delivered to pharmacy department |
| --- |
|  |
| 3/6-4/24/17: Weekly pharmacy work group meetings to address monitoring updates |
|  |
| 3/16/17: Presentation delivered to ID physicians |
|  |
| 5/15/17: AUC24 updates approved by the pharmacy work group |
|  |
| 5/23/17: AUC24 updates approved by P&T |
|  |
| 7/10/17: Education delivered to pharmacy residents |
|  |
| 7/11/17: AUC24 guideline finalized |
|  |
| 8/2/17: Meeting with IT to create EHR vancomycin-specific monitoring note |
|  |
| 8/2/17: Education video recorded |
|  |
| 8/17/17: Email sent to pharmacy department regarding upcoming practice change with transition date of 9/5/17, education video hyperlink, and schedule for 30-minute live education sessions |
|  |
| 8/21-9/1/17: Live pharmacist education sessions lasting 30-minutes each |
|  |
| 8/22/17: Email sent to GME program directors regarding practice change |
|  |
| 8/23/17: Email sent to UKHC administration offices with FAQ sheet for provider education |
|  |
| 8/30/17: Meeting with clinical laboratory director to discuss practice change |
|  |
| 8/30/17: Education delivered to ID physicians |
|  |
| 8/30/17: Email sent to nursing directors and managers with FAQ sheet |
|  |
| 9/5/17: Go-live date. Emails sent to pharmacy department and ID physicians |
|  |
| 9/5/17: Phlebotomy notified of change across the institution |
|  |
| 9/19/17: Monthly physician newsletter disseminated with information regarding the practice change |
|  |
| 9/25/17: Email sent to pharmacy department with general reminders, AUC24 calculator, revised AUC24 dosing suggestions, and recent updates in the literature |

Definitions: AUC24 (24-hour area under the curve), ACPE (Accreditation Council for Pharmacy Education), ID (infectious diseases), P&T (Pharmacy & Therapeutics Committee), IT (information technology), EHR (electronic health record), GME (Graduate Medical Education), UKHC (University of Kentucky HealthCare), FAQ (frequently asked questions).
